# Supplementary material
Source: PubMed Central journal article supplement (PMC5561665)
Supplement: NIHMS878318-supplement-2.pdf [file NIHMS878318-supplement-2.pdf]

# SUPPLEMENTAL DATA

## Inhibition of miR-181a Protects Female Mice from Transient Focal Cerebral Ischemia by Targeting Astrocyte Estrogen Receptor- $\alpha$

Stary *et al.*

### Materials and Methods

**Table S1. ICV injection**

| Name                                 |                                        | Catalog #   | Company         |
|--------------------------------------|----------------------------------------|-------------|-----------------|
| MiR-181a-5p antagomir                | 5'-<br>ACUCACCGACAGCGUUGAAUGUU-<br>3'  | CTM-160431  | GE<br>Dharmacon |
| Mismatch-Control Sequence            | 5'-<br>AGUCAGCGAGAGCCUUGAUUGUU-<br>3', | CTM-160432  | GE<br>Dharmacon |
| DOTAP Liposomal Transfection Reagent |                                        | 11202375001 | Roche           |

**Table S2. Cell Culture Transfection**

| Name                                   | Catalog # | Company                               |
|----------------------------------------|-----------|---------------------------------------|
| Lipofectamine-2000™                    | 11668019  | Invitrogen, Waltham, MA               |
| <i>mirVana</i> ® miR-181a-5p inhibitor | MH10421   | Thermo-Fisher Scientific, Waltham, MA |
| <i>mirVana</i> ® mismatch-control      | 4464058   | Thermo Fisher Scientific              |
| <i>mirVana</i> ® miR-181a-5p mimic     | MC10421   | Thermo Fisher Scientific              |
| Power TSB™                             | 480003-00 | Exiqon, Vedbaek, Denmark              |

**Table S3. Reverse Transcription Quantitative PCR (RT-qPCR) primer probe sets and reagents**

| Name                                               | Catalog #  | Company                  |
|----------------------------------------------------|------------|--------------------------|
| mmu-miR-181a-5p                                    | Mm04238229 | Thermo Fisher Scientific |
| testis-determining factor/sex-determining region Y | Mm00441712 | Thermo Fisher Scientific |

|                                           |            |                                     |
|-------------------------------------------|------------|-------------------------------------|
| Glyceraldehyde 3-phosphate dehydrogenase  | Mm99999915 | Thermo Fisher Scientific            |
| U6 small nuclear RNA                      | 001973     | Thermo Fisher Scientific            |
| TaqMan® Assay Kit                         | 4304437    | Applied Biosystems, Foster City, CA |
| TRIzol®                                   | 15596026   | Invitrogen                          |
| TaqMan MicroRNA Reverse Transcription Kit | 4366596    | Applied Biosystems                  |

**Table S4. Antibodies for Immunoblotting & Immunocytochemistry**

| Name                                                     | Catalog # | Company                  | Dilution |
|----------------------------------------------------------|-----------|--------------------------|----------|
| <b>Primary Antibodies</b>                                |           |                          |          |
| Anti ER $\alpha$                                         | Ab32063   | Abcam                    | 1:500    |
| Anti $\beta$ -actin                                      | 926-42210 | LiCOR Bioscience         | 1:3000   |
| Anti-Glucose Regulated Protein 78                        | PA1-37806 | Thermo Fisher Scientific | 1:10     |
| Anti XIAP Antibody                                       | 3331      | Prosci                   | 1:1000   |
| Anti BCL2                                                | sc-7382   | Santa Cruz Biotech       | 1:500    |
| <b>Secondary Antibodies</b>                              |           |                          |          |
| IRDye® 800CW Donkey anti-Mouse IgG (H + L)               | 926-32212 | LiCOR Bioscience         | 1:15,000 |
| Alexa Fluor® 594nm-conjugated Goat anti-Rabbit IgG (H+L) | A-11037   | Thermo Fisher Scientific | 1:500    |

## Results

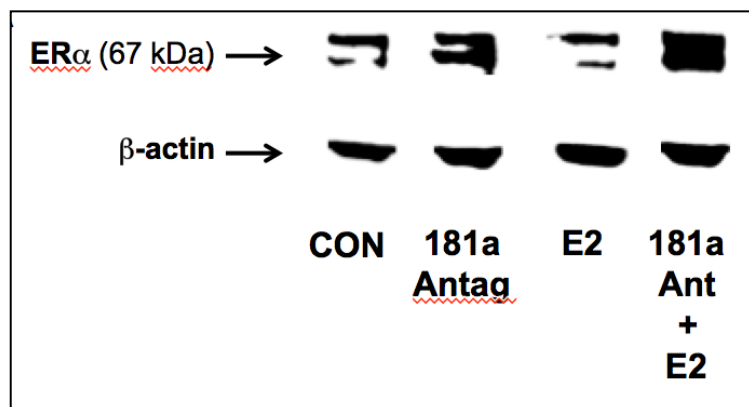

**Figure S1.** Example of immunoblot of 67-68 kDa doublet ER $\alpha$  band from brains of OVX mice. Antag = antagomir; CON = control; E2 = 17 $\beta$ -estradiol, ER $\alpha$  = estrogen receptor alpha.
